## Title

# Multiplexed fluorescence imaging of GPCR downstream signaling dynamics at the single-cell level.

## Authors

Ryosuke Tany<sup>1,2,3</sup>, Yuhei Goto<sup>1,2,3,\*</sup>, Yohei Kondo<sup>1,2,3</sup>, and Kazuhiro Aoki<sup>1,2,3,4,\*</sup>

## Affiliations

<sup>1</sup>Quantitative Biology Research Group, Exploratory Research Center on Life and Living Systems (ExCELLS), National Institutes of Natural Sciences, 5-1 Higashiyama, Myodaiji-cho, Okazaki, Aichi 444-8787, Japan.

<sup>2</sup>Division of Quantitative Biology, National Institute for Basic Biology, National Institutes of Natural Sciences, 5-1 Higashiyama, Myodaiji-cho, Okazaki, Aichi 444-8787, Japan.

<sup>3</sup>Department of Basic Biology, School of Life Science, SOKENDAI (The Graduate University for Advanced Studies), 5-1 Higashiyama, Myodaiji-cho, Okazaki, Aichi 444-8787, Japan.

<sup>4</sup>Lead Contact

\*Correspondence: Yuhei Goto (y-goto@nibb.ac.jp), and Kazuhiro Aoki (k-aoki@nibb.ac.jp)

## Keywords

GPCR, signaling dynamics, fluorescence imaging, dopamine, serotonin

# Abstract

G-protein-coupled receptors (GPCRs) play an important role in sensing various extracellular stimuli, such as neurotransmitters, hormones, and tastants, and transducing the input information into the cell. While the human genome encodes more than 800 GPCR genes, only four  $G\alpha$ -proteins ( $G\alpha_s$ ,  $G\alpha_{i/o}$ ,  $G\alpha_{q/11}$ , and  $G\alpha_{12/13}$ ) are known to couple with GPCRs. It remains unclear how such divergent GPCR information is translated into the downstream G-protein signaling dynamics. To answer this question, we report a multiplexed fluorescence imaging system for monitoring GPCR downstream signaling dynamics at the single-cell level. Genetically encoded biosensors for cAMP,  $Ca^{2+}$ , RhoA, and ERK were selected as markers for GPCR downstream signaling, and were stably expressed in HeLa cells. GPCR was further transiently overexpressed in the cells. As a proof-of-concept, we visualized GPCR signaling dynamics of 5 dopamine receptors and 12 serotonin receptors, and found heterogeneity between GPCRs and between cells. Even when the same  $G\alpha$  proteins were known to be coupled, the patterns of dynamics in GPCR downstream signaling, including the signal strength and duration, were substantially distinct among GPCRs. These results suggest the importance of dynamical encoding in GPCR signaling.

# INTRODUCTION

G-protein-coupled receptors (GPCRs), the largest family of membrane proteins, are triggered by various types of ligands, such as neurotransmitters (e.g., dopamine, serotonin), peptide hormones (e.g., angiotensin II), tastants, and light, to name a few. More than 800 GPCR genes are encoded in the human genome, and play indispensable roles in a vast variety of biological processes [1]. Moreover, GPCRs are one of the most important targets for drug discovery, as demonstrated by the fact that GPCRs constitute targets of approximately one-third of all Food and Drug Administration (FDA)-approved drugs [2].

Upon ligand stimulation, GPCRs activate heterotrimeric G proteins composed of alpha, beta, and gamma subunits ( $G\alpha$ ,  $G\beta$ , and  $G\gamma$ ) [3]. The activated GPCRs promote guanine nucleotide exchange of  $G\alpha$  proteins from a GDP-bound inactive state to a GTP-bound active state [4]. The different types of GTP-loaded  $G\alpha$  proteins bind to and activate/inactivate different downstream effectors (**Fig. 1A**).  $G\alpha_s$  positively regulates and  $G\alpha_{i/o}$  negatively regulates adenylate cyclases, which are enzymes that catalyze cyclic AMP (cAMP) production [5,6].  $G\alpha_{q/11}$  induces intracellular  $Ca^{2+}$  increase through phospholipase

C beta (PLC $\beta$ ), while G $\alpha_{12/13}$  activates the Rho family of small GTPases [7–9]. It has also been reported that G $\alpha_s$ , G $\alpha_{i/o}$ , and G $\alpha_{q/11}$  regulate the ERK MAP kinase pathway [10–13]. In addition to G $\alpha$  proteins, accumulating evidence supports the independent roles of the G $\beta\gamma$  complex in activating Rho family GTPases [14]. Other well-known mediators of GPCR signaling, including regulators of G protein signaling (RGSs), G-protein-coupled receptor kinases (GRKs), and  $\beta$ -arrestin, have also been shown to modulate the ERK MAP kinase pathway [10].

Much effort has been devoted to the development of imaging systems for quantifying GPCR activation upon ligand stimulation. The imaging systems reported so far can be roughly classified into two types: systems that utilize the principle of ligand-induced association/dissociation between GPCRs, effectors, and heterotrimeric G proteins, and systems that employ downstream signaling molecules of GPCRs as a marker. In the former imaging methods, protein-protein interactions such as GPCR-G proteins, GPCR- $\beta$ -arrestin, and G $\alpha$ -G $\beta\gamma$  are detected by techniques such as Förster (or fluorescence) resonance energy transfer (FRET) and bioluminescence resonance energy transfer (BRET) [15–17]. Other methods for measuring these protein-protein interactions by converting them into gene expression or by cleavage of membrane molecules by metalloproteinases such as ADAM17/TACE have been proposed to enable large-scale GPCR screening [18,19]. These techniques directly evaluate ligand-induced GPCR activation, but they do not allow estimation of the extent to which the GPCR activation evokes downstream signaling. The latter type of imaging methods detect downstream cell signaling induced by GPCRs such as cAMP and Ca<sup>2+</sup> by small chemical compounds and genetically encoded biosensors [20–23]. However, a drawback of this method is that it is challenging to visualize two or more types of signal transduction systems in a multiplexed manner, and the throughput is practically limited.

Many patterns of GPCR-G $\alpha$  protein coupling have been investigated, revealing that some GPCRs can promiscuously couple to multiple G proteins [19,24]. Yet, in most cases, only a limited amount of quantitative information is available. Thus, it is still unknown to what extent the GPCRs activate G $\alpha$  proteins and what types of downstream signaling dynamics an activated GPCR generates. This study reports a multiplexed imaging system for quantifying cAMP, Ca<sup>2+</sup>, RhoA, and ERK activation dynamics induced by GPCR activation at the single-cell level. For this purpose, the FRET-based biosensors for cAMP and RhoA activity, the red fluorescent Ca<sup>2+</sup> biosensor, and the infra-red fluorescent ERK biosensors were selected. We first established two types of HeLa cell lines stably expressing cAMP/Ca<sup>2+</sup> biosensors and RhoA/ERK biosensors. These two cell lines were then co-

cultured, transfected with GPCR genes, and stimulated with the ligand to monitor the changes in cAMP, Ca<sup>2+</sup>, RhoA, and ERK activity for multiplexed imaging. Taking advantage of this method, we quantified the GPCR signaling dynamics of 5 dopamine receptors and 12 serotonin receptors, demonstrating a substantial difference even between GPCRs that bind to the same Gα proteins and cellular heterogeneity of downstream signals.

## Experimental

### Plasmids

The cAMP biosensor (CFP-Epac-YFP) was developed based on the previous work [20], and it contained monomeric teal fluorescent protein (mTFP), the human RAPGEF3 (EPAC) gene (corresponding to amino acids 149-881) cloned from HeLa cells by RT-PCR, and mVenus. The cDNA of the cAMP biosensor was inserted into the pCX4neo vector [25], a retroviral vector with IRES-*neo* (the G418-resistance gene), providing pCX4neo-CFP-Epac-YFP. The cDNA of the red fluorescent genetically encoded Ca<sup>2+</sup> indicators for optical imaging (R-GECO1.2) [21,26] was subcloned into the pPBbsr vector [27,28], a PiggyBac transposon vector with IRES-*bsr* (the blasticidin S-resistance gene), generating pPBbsr-R-GECO1.2. The dimerization-optimized reporter for activation (DORA) RhoA biosensor (DORA-RhoA) was used to visualize RhoA activity, and the DORA-RhoA was a gift from Dr. Yi Wu (University of Connecticut Health Center, CT) [22]; DORA-RhoA consists of the Rho-binding domain of PKN1, circularly permuted Venus (cpVenus), a linker, Cerulean3, and RhoA. The cDNA of DORA-RhoA was subcloned into pT2Absr [29], which was generated by inserting IRES-*bsr* into the pT2AL200R175 vector, generating pT2Absr-DORA-RhoA. The cDNA of the ERK activity biosensor, ERK-KTR [23], was fused with the cDNA of monomeric near-infrared fluorescent protein (miRFP703)[30], and subcloned into the pCSIIbleo vector, a lentivirus vector with IRES-*bleo* (the zeocin-resistance gene) [31], generating pCSIIbleo-ERK-KTR-miRFP703. The plasmid encoding the nuclear marker, Linker Histone-H1 (H1)-mCherry, was subcloned into a pCSIIneo vector [32], generating pCSIIneo-H1-mCherry. The GPCR plasmids were derived from the PRESTO-Tango kit originated from Dr. Bryan Roth (Addgene kit # 1000000068) [18]. pCMV-VSV-G-RSV-Rev was a gift of Dr. Miyoshi (RIKEN, Japan) [33], pGP and pCSIIpuro-MCS were a gift from Dr. Matsuda (Kyoto University, Japan) [34,35], psPAX2 was a gift from Dr. Trono (Addgene plasmid #12260) [36], pCAGGS-T2TP was a gift from Dr. Kawakami (National Institute for Genetics, Japan) [29], and pCMV-mPBase (neo-) was a gift from Dr. Bradley (Wellcome Trust Sanger Institute, UK) [27].

## Reagents

Epidermal growth factor (EGF) was purchased from Sigma-Aldrich (St. Louis, MO). Blasticidin S, zeocin, G418, and puromycin were obtained from InvivoGen (Carlsbad, CA). Forskolin (FSK) and 3-isobutyl-1-methyl-xanthine (IBMX) were purchased from Wako (Osaka, Japan). Dopamine was obtained from Sigma-Aldrich (H8602) and solubilized into 10 mM HCl as a 1 M stock solution. Serotonin was purchased from Cayman (14332) and solubilized into 10 mM HCl as a 50 mM stock solution. Adenosine 5'-triphosphate disodium salt hydrate (ATP) was obtained from TCI (A0157) and solubilized into DDW as a 100 mM stock solution.

## Cell culture

HeLa cells and HEK-293T cells were gifted from Dr. Matsuda (Kyoto University, Japan), and cultured in Dulbecco's Modified Eagle's Medium (DMEM) high glucose (Wako; nacalai tesque) supplemented with 10% fetal bovine serum (Sigma-Aldrich) at 37°C in 5% CO<sub>2</sub>. For the live-cell imaging, HeLa cells were plated on CELLview cell culture dishes (glass bottom, 35 mm diameter, 4 components: The Greiner Bio-One) one day before transfection. Transfection was performed with a mixture containing 230 ng plasmid encoding TANGO-GPCR, 20 ng plasmid carrying the puromycin-resistance gene (pCSIIpuro-MCS), and 0.25  $\mu$ L of 293fectin transfection reagent (Thermo Fisher Scientific) in each well. In the dopamine receptor co-expression experiment in Figure 4, TANGO GPCR plasmids were used in a 1: 1 mixture. One day after the transfection, puromycin (final concentration 2  $\mu$ g/ml) was administered, and transfected cells were selected for 2 days. After the selection of transfected cells, the medium was replaced with starvation medium (FluoroBrite (nacalai tesque)/1x GlutaMAX (GIBCO)/0.1% BSA) 18 ~ 25 h before the imaging was started.

## Stable cell line construction

To establish a stable cell line expressing R-GECO1.2 and CFP-Epac-YFP (HeLa/cAMP/Ca<sup>2+</sup>), the PiggyBac transposon system and the retroviral vector system were used, respectively. The pPBbsr-R-GECO1.2 was co-transfected with pCMV-mPBBase (neo-) encoding the PiggyBac transposase by using 293fectin. One day after the transfection, cells were selected with 20  $\mu$ g/ml blasticidin S for at least one week. For retroviral production, the pCX4neo-CFP-Epac-YFP was transfected into HEK-293T cells together with pGP and pCSV-VSV-G-RSV-Rev by using Polyethylenimine "MAX" MW 40,000 (Polyscience Inc., Warrington, PA). Virus-containing media were collected at 48 h after the transfection, filtered, and used to infect the cell lines expressing R-GECO1.2 with 10  $\mu$ g/mL polybrene.

After the infection, cells were selected with 20 µg/ml blasticidin S and 1 mg/mL G418 for at least one week, followed by single-cell cloning. Clonal cells were used in the experiments Figure 2 and Figure 4.

To establish a stable cell line expressing ERK-KTR-miRFP703, DORA-RhoA, and H1-mCherry (HeLa/RhoA/ERK), a lentiviral vector system (for ERK-KTR-miRFP703 and H1-mCherry) and a Tol2 transposon-based system (for DORA-RhoA) were applied, respectively. For lentiviral production, HEK-293T cells were co-transfected with the pCSIIbleo-ERK-KTR-miRFP703, psPAX2, and pCSV-VSV-G-RSV-Rev by using Polyethylenimine “MAX” MW 40,000. Virus-containing media were collected at 48 h after the transfection, filtered, and used to infect HeLa cells with 10 µg/mL polybrene. After the infection, cells were selected with 100 µg/ml zeocin for at least one week. Next, the pT2Absr-DORA-RhoA was co-transfected into HeLa cells stably expressing ERK-KTR-miRFP703 together with the pCAGGS-T2TP plasmid encoding transposase by using 293fectin. One day after the transfection, cells were selected by at least one week of treatment with 100 µg/ml zeocin and 20 µg/ml blasticidin S. The pCSIIneo-H1-mCherry was introduced into this cell line by using a lentiviral viral vector system as well as ERK-KTR-miRFP703. One day after the infection, cells were selected by at least one week of treatment with 100 µg/ml zeocin, 20 µg/ml blasticidin S, and 1 mg/mL G418, followed by single-cell cloning.

Single-cell clones were used in the experiments in Figure 2 and Figure 4. In other experiments, both bulk cells and single-cell clones were used.

## Time-lapse imaging

Images were acquired on an IX81 inverted microscope (Olympus) equipped with a Retiga 4000R cooled Mono CCD camera (QImaging), a Spectra-X light engine illumination system (Lumencor), an IX2-ZDC laser-based autofocus system (Olympus), a UAPO/340 40x/1.35 oil iris objective lens (Olympus), a MAC5000 controller for filter wheels and XY stage (Ludl Electronic Products), an incubation chamber (Tokai Hit), and a GM-4000 CO<sub>2</sub> supplier (Tokai Hit). The following filters and dichroic mirrors were used: for R-GECO1.2 and mCherry, an FF01-580/20 excitation filter (Semrock), a 20/80 beamsplitter dichroic mirror (Chroma), and an FF01-641/75 emission filter (Semrock); for iRFP, an FF01-632/22 excitation filter (Semrock), an FF408/504/581/667/762-Di01 dichroic mirror (Semrock), and an FF01-692/LP emission filter (Semrock); for FRET, an FF01-438/24 excitation filter (Semrock), an XF2034 455DRLP dichroic mirror (Omega Optical), an FF01-542/27 emission filter (Semrock); for CFP, an FF01-438/24 excitation filter (Semrock), an XF2034 455DRLP dichroic mirror (Omega Optical), and an FF01-483/32 emission filter (Semrock). The microscopes were controlled by MetaMorph software (Molecular Devices).

## Image and data analysis

Fiji, a distribution of ImageJ [37], was used for image processing and analysis. For all images, background signals were subtracted by the rolling ball method, and then the images were registered by StackReg, a Fiji plugin to correct misregistration. Note that the median filter was used for the time-lapse images before registration to remove camera noise to prevent the registration error. For FRET images of CFP-Epac-YFP or DORA-RhoA, the ratio images of the CFP/FRET or FRET/CFP ratio were generated, respectively, and then ratio images were visualized by the intensity-modulated display (IMD) mode, where eight colors from red to blue are used to represent the CFP/FRET ratio.

For the quantification of cAMP levels,  $\text{Ca}^{2+}$  levels, and RhoA activity, a circular region of interest (ROI) surrounding 20 pixels was set in each cell, and the time-series data of fluorescence intensity were obtained. The nuclei of ERK-KTR-expressing cells were segmented with H1-mCherry fluorescence to measure the fluorescence intensity of the nucleus, and the cytoplasmic fluorescence intensity was measured using the cytoplasmic ring (cytoring) surrounding the segmentation of the nucleus. Mean pixel intensities of the nucleus and cytoring were measured, and these values were used to calculate the cytoplasm/nucleus (C/N) ratio as a proxy for the ERK activity. The quantified time traces were further normalized by the average values before stimulation (0-5 min), except in Figure 6C.



# RESULTS

## Development of multiplexed fluorescence imaging for the quantification of GPCR signaling.

To cover a wide range of GPCR signals mediated by individual Gα subtypes, we chose cAMP, Ca<sup>2+</sup>, RhoA, and ERK as markers (**Fig. 1A**). We screened genetically encoded biosensors for these signaling molecules, and finally selected the following biosensors: CFP-Epac-YFP (a Förster resonance energy transfer (FRET)-based cAMP biosensor) [20], R-GECO1.2 (a red fluorescent Ca<sup>2+</sup> biosensor) [21], DORA-RhoA (a FRET-based RhoA biosensor) [22], and ERK-KTR fused with mRFP703 (an infra-red fluorescent ERK biosensor) [23] (**Fig. 1A**). For multiplexed imaging, two types of stable HeLa cell lines were established: a cell line expressing the cAMP biosensor and R-GECO1.2 (HeLa/cAMP/Ca<sup>2+</sup>), and a cell line expressing DORA-RhoA and ERK-KTR (HeLa/RhoA/ERK) (**Fig. 1B**) together with linker histone H1-mCherry as a nuclear marker to quantify the cytoplasm/nucleus (C/N) ratio automatically. The two cell lines were co-cultured and transfected with the plasmids for GPCR expression and puromycin-resistance gene expression. One day after transfection, the cells were treated with puromycin to select GPCR-expressing cells. After the selection, the cells were further serum-starved for 18~25 h before imaging to reduce the ERK activity at a basal level. The plasmids from the PRESTO-Tango GPCR kit were used for the expression of each GPCR, and therefore the exogenous GPCR protein was fused with the HA signal peptide and FLAG-tag at the N-terminus and V2 tail, the TEV cleaved site, and the rtTA moieties at the C-terminus [18]. We suspect that these parts have no considerable effects on GPCR signaling.



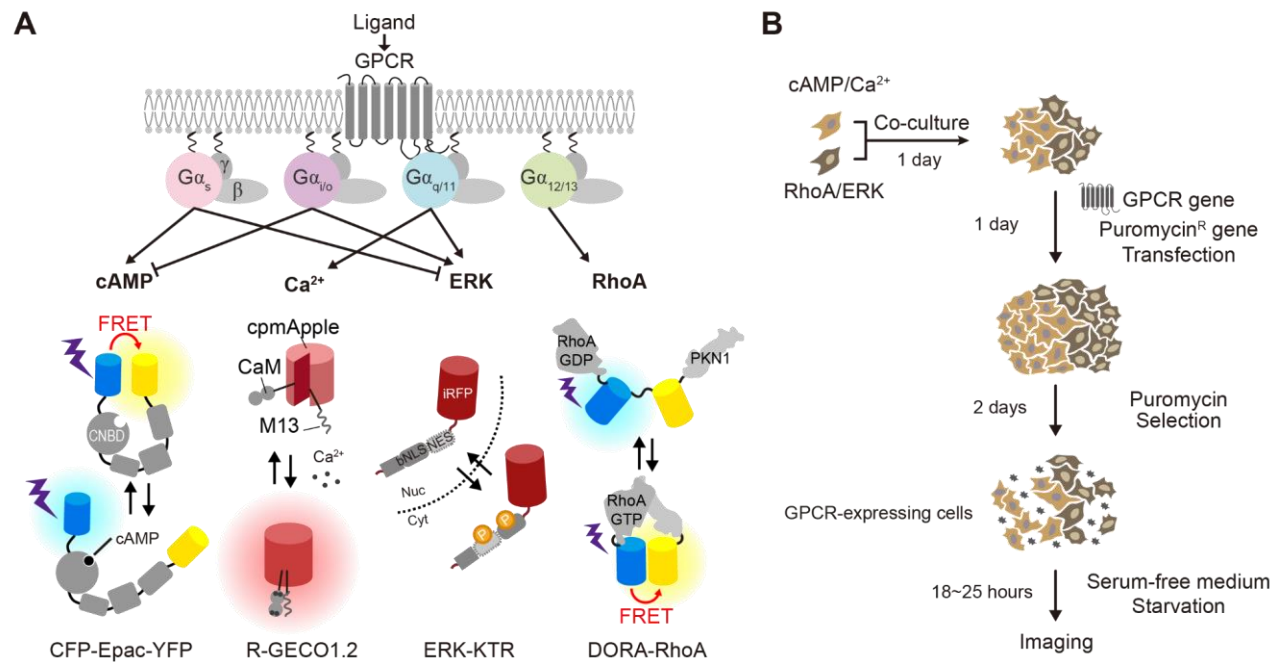

**Figure 1. Development of the multiplexed fluorescence imaging system for quantifying the GPCR signaling dynamics.**

(A) (Upper panel) Schematic model of  $G\alpha$  coupling and typical GPCR-mediated intracellular signaling pathways. (Lower panel) The mode of action of the indicated biosensors is shown.

(B) Experimental procedure of multiplexed fluorescence imaging.

### Validation of cell lines for monitoring GPCR signaling.

As a validation of the cell lines mentioned above, we stimulated the cells with chemical compounds, ligands, and epidermal growth factor (EGF), which are well-known to upregulate cAMP,  $Ca^{2+}$ , RhoA, and ERK. HeLa/cAMP/ $Ca^{2+}$  cells were stimulated with Forskolin and IBMX (**Fig. 2A**) and ATP (**Fig. 2B**). The cells showed a sustained increase in the CFP/FRET ratio of the CFP-Epac-YFP biosensor and pulsatile increase in red fluorescence of R-GECO1.2, indicating a sustained cAMP increase and pulsatile  $Ca^{2+}$  increase, respectively. Similarly, HeLa/RhoA/ERK cells were stimulated with EGF, resulting in a transient rise in the FRET/CFP ratio of DORA-RhoA and gradual translocation of ERK-KTR-miRFP703 from the nucleus to the cytoplasm (**Fig. 2C, 2D**). The data indicate that EGF induced transient RhoA and gradual ERK activation. We represent ERK activity as the cytoplasm/nucleus (C/N) ratio of ERK-KTR-miRFP703 fluorescence intensity [23,30]. It is noted that our microscope setting did not show any spectral cross-talk between CFP-Epac-YFP and R-GECO1.2 or between DORA-RhoA and ERK-KTR-miRFP703. Taken together, these results demonstrated that the cell lines expressing biosensors allowed monitoring of cAMP,  $Ca^{2+}$ , RhoA, and ERK activity at the single-cell level.

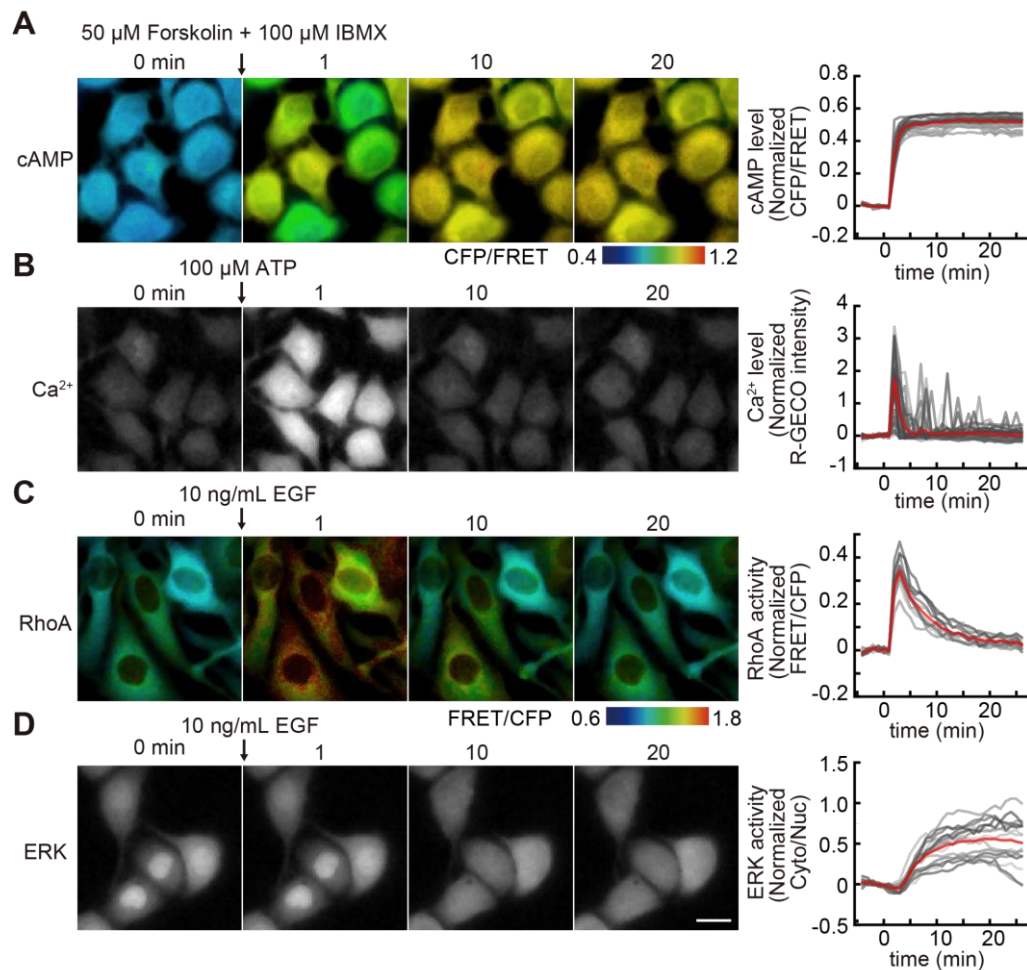

**Figure 2. Validation of cell lines for monitoring GPCR signaling.**

(A-D) (Left panels) HeLa/cAMP/ $\text{Ca}^{2+}$  cells (A, B) and HeLa/RhoA/ERK cells (C, D) were treated with 50  $\mu\text{M}$  Forskolin and 100  $\mu\text{M}$  IBMX (A), 100  $\mu\text{M}$  ATP (B), and 10 ng/mL EGF (C and D). Representative CFP/FRET ratio images (A) and FRET/CFP ratio images (C) are shown in the IMD mode, where eight colors from red to blue are used to represent the CFP/FRET ratio (A) or FRET/CFP ratio (C) with the intensity of each color indicating the denominator channels. (Right panels) The response of the biosensors for cAMP levels,  $\text{Ca}^{2+}$  levels, ERK activity, and RhoA activity is normalized by dividing by the averaged value before stimulation and plotted as a function of elapsed time after stimulation. The red and gray lines represent the time-course for the average and individual cells, respectively.  $N = 32, 45, 13, 16$  cells, respectively. Scale bar, 10  $\mu\text{m}$ .

### Signaling dynamics of dopamine receptors.

A neuromodulator, dopamine, controls many physiological functions, including locomotion, reward, cognitive function, and learning [38]. Because dopamine is involved in a wide range of physiological processes, multiple human disorders have been linked to dopaminergic dysfunctions such as Parkinson's disease, schizophrenia, ADHD, and Tourette's syndrome [39]. The five subtypes of

dopamine receptors, D1, D2, D3, D4, and D5 receptors, are encoded by the genes *DRD1*, *DRD2*, *DRD3*, *DRD4*, and *DRD5*, respectively, in the human genome, and collectively these subtypes are known to mediate all physiological functions of dopamine [39,40]. The dopamine receptors are GPCRs and are divided into two groups: the D1-class dopamine receptors (D1 and D5) and the D2-class dopamine receptors (D2, D3, and D4) [41]. The D1-class dopamine receptors are generally coupled to  $G_{\alpha_s}$ , while the D2-class dopamine receptors are coupled to  $G_{\alpha_{i/o}}$  (**Fig. 3A**). Thus, the D1 and D2 receptors positively and negatively regulate adenylyl cyclases (ACs), which catalyze the production of cAMP, respectively. Furthermore, it has been reported that D1, D5, and a putative D1-D2 heterodimer couple and activate  $G_{\alpha_{q/11}}$  and  $Ca^{2+}$  signaling [42–45]. However, this idea remains controversial because D1 and D2 are not coexpressed in most striatal neurons in mice [39], and further studies will be needed to quantitatively investigate to extent to which these dopamine receptors contribute to the  $G_{\alpha_{q/11}}$  activation and  $Ca^{2+}$  increase.

We quantified the cAMP,  $Ca^{2+}$ , RhoA, and ERK activation dynamics evoked by dopamine receptors with the multiplexed imaging system (**Fig. 1B**). In HeLa cells lacking expression of dopamine receptors, dopamine stimulation did not elicit any change in cAMP,  $Ca^{2+}$ , RhoA, or ERK activity (**Fig. 3B**, left column). This could be simply because HeLa cells do not express any dopamine receptors. As expected, the expression of D1-type receptors, i.e., *DRD1* and *DRD5*, increased cAMP levels upon dopamine stimulation, while the expression of D2-type receptors, i.e., *DRD2*, *DRD3*, and *DRD4*, did not change any cAMP levels (**Fig. 3B**, first row). This was probably because the basal cAMP level was low, and thus the cAMP biosensor could not detect the decrease in cAMP levels by D2-type receptors. Weak, measurable  $Ca^{2+}$  pulses were observed in HeLa cells expressing *DRD1* and *DRD2*, suggesting that *DRD1* and *DRD2* receptors are weakly coupled to  $G_{\alpha_{q/11}}$  receptors (**Fig. 3B**, second row). RhoA was also activated in *DRD1* or *DRD5* expressing HeLa cells for an unknown reason (**Fig. 3B**, third row). ERK was transiently decreased in HeLa cells expressing *DRD1* or *DRD5*, but it is challenging to evaluate dopamine-induced ERK signaling due to significant cell heterogeneity (**Fig. 3B**, fourth row).

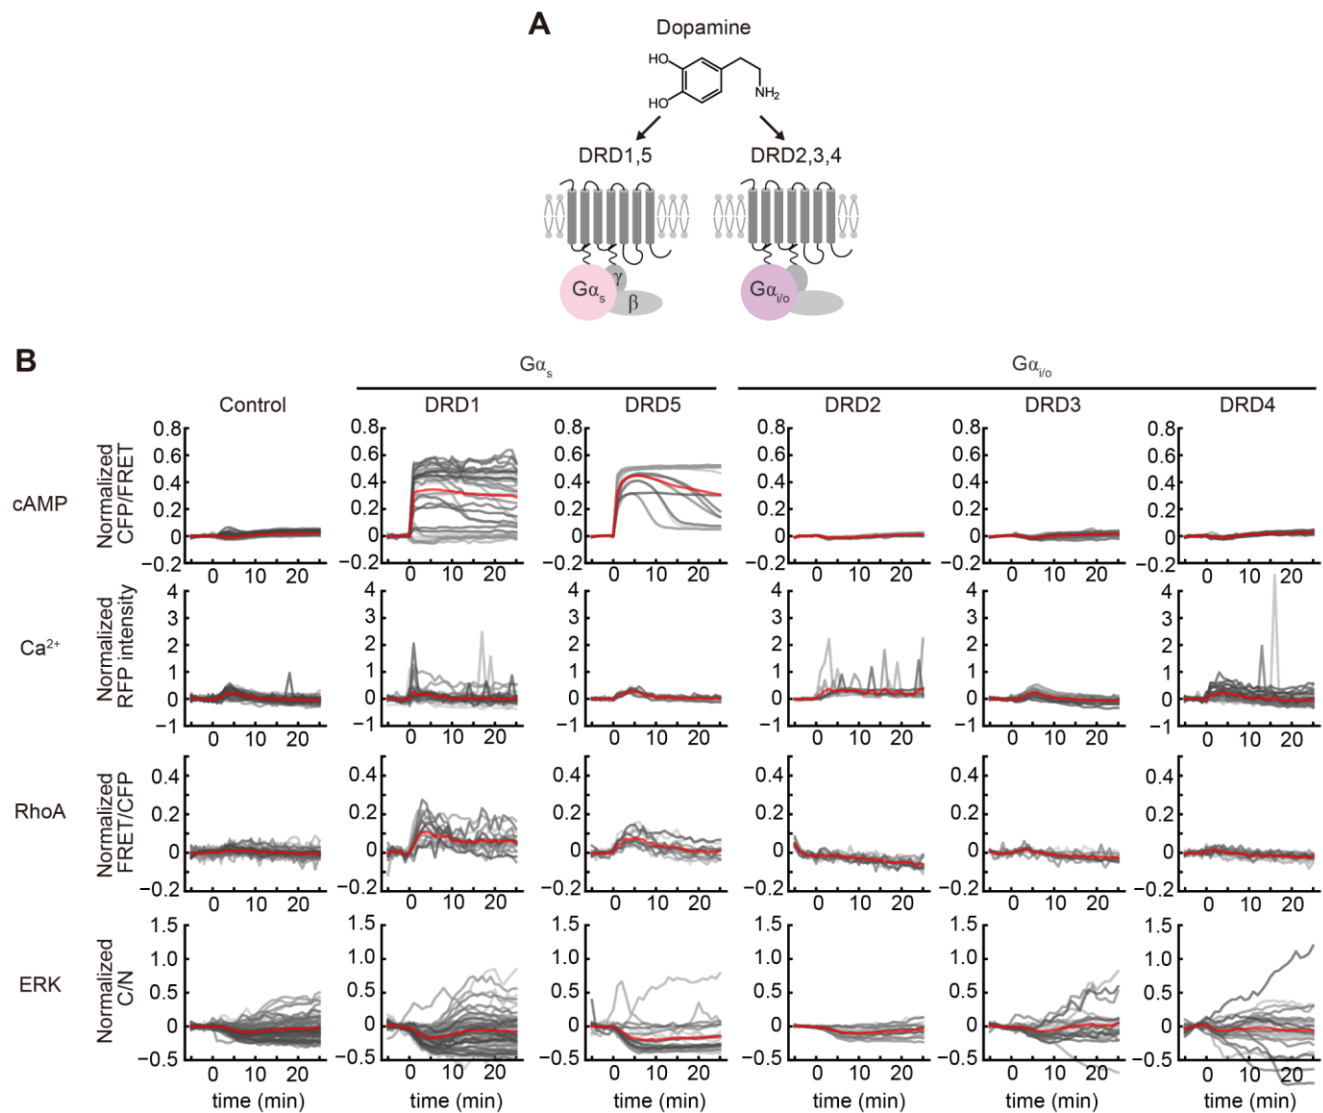

**Figure 3. Signaling dynamics induced by each dopamine receptor.**

(A) Schematic illustration of dopamine, dopamine receptors coupling to  $G\alpha$ , and downstream signaling. (B) Normalized responses of each reporter in HeLa cells expressing the indicated dopamine receptors are shown. The response of the biosensors for cAMP levels,  $Ca^{2+}$  levels, ERK activity, and RhoA activity is normalized by dividing by the averaged value before stimulation and plotted as a function of elapsed time after administration of 10  $\mu M$  dopamine. The red and gray lines represent the time-course for the average and individual cells ( $n > 10$  cells), respectively.

Next, we examined whether heterodimerized dopamine receptors synergistically increase intracellular  $Ca^{2+}$  levels upon dopamine stimulation, because it has been reported that heterodimers of dopamine receptors such as the D1-D2 dimer activate  $G\alpha_{q/11}$  signaling [42–44]. HeLa cells were co-transfected with ten possible combinations of dopamine receptors and stimulated with dopamine. Unexpectedly, we found no enhancement of the dopamine-induced  $Ca^{2+}$  increase by co-expression of

dopamine receptors, but rather the co-expression inhibited the pulsatile  $\text{Ca}^{2+}$  increase observed in HeLa cells expressing DRD1 or DRD5 (**Fig. 4**).

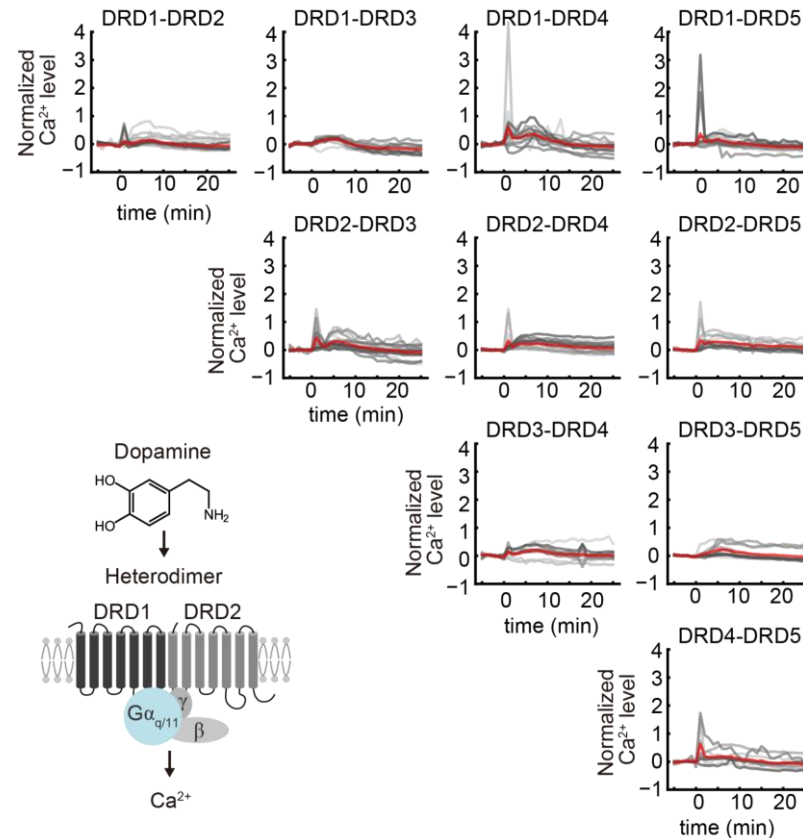

**Figure 4.  $\text{Ca}^{2+}$  dynamics of the heterodimer of dopamine receptors upon dopamine stimulation.** Normalized responses of  $\text{Ca}^{2+}$  biosensors in HeLa cells expressing the indicated combination of dopamine receptors are shown. The fluorescent intensities of  $\text{Ca}^{2+}$  biosensors are normalized by dividing by the averaged value before stimulation and plotted as a function of elapsed time after 10  $\mu\text{M}$  dopamine administration. The red and gray lines represent the average and individual cells ( $n > 10$  cells), respectively.

### Signaling dynamics of serotonin receptors.

Serotonin (5-hydroxytryptamine, 5-HT) plays essential roles in a wide range of physiological phenomena, including sensory perception and behaviors [46]. The serotonin receptors are the most prominent among the GPCR families for neurotransmitters; 13 distinct genes encode GPCRs for the serotonin, and there is one ligand-gated ion channel, the 5-HT3 receptor [47]. The G-protein coupled serotonin receptors are grouped into three families depending on which  $\text{G}\alpha$  proteins they primarily couple: the  $\text{G}\alpha_{q/11}$ -coupled receptors (HTR2A, HTR2B, and HTR2C),  $\text{G}\alpha_{i/o}$ -coupled receptors

(HTR1A, HTR1B, HTR1D, HTR1E, HTR1F, HTR5), and  $G\alpha_s$ -coupled receptors (HTR4, HTR6, and HTR7) (**Fig. 5A**). Although these receptors are divided based primarily on their coupling with  $G\alpha$  proteins, recent works have shown that GPCRs can couple to more than one type of  $G\alpha$  proteins [19]. In addition, the constitutive activity of serotonin receptors has been reported, though the basal- and ligand-induced activities of serotonin receptors have not yet been thoroughly evaluated.

We therefore analyzed the G-protein-coupled serotonin receptor-induced cAMP,  $Ca^{2+}$ , RhoA, and ERK activation with the multiplexed imaging system (**Fig. 1B**). Parental HeLa cells did not show any response of these signaling molecules to serotonin stimulation (**Fig. 5B**, left column), suggesting that HeLa cells do not express serotonin receptors. The expression of  $G\alpha_{q/11}$ -coupled HTR2A and HTR2C induced a sustained or pulsatile  $Ca^{2+}$  increase upon 5-HT stimulation, while slight or no response of  $Ca^{2+}$  was observed in HTR2B-expressing cells (**Fig. 5B**, second row). 5-HT stimulation slightly activated RhoA in HTR2A- or HTR2B-expressing cells (**Fig. 5B**, third row). Some cells showed a substantial change in ERK activity, but on average, many cells did not show a shift in ERK activity (**Fig. 5B**, fourth row). We next analyzed the signaling dynamics of  $G\alpha_{i/o}$ -coupled serotonin receptors, i.e., HTR1A, HTR1B, HTR1D, HTR1E, HTR1F, and HTR5. As in D2-type dopamine receptors, the expression of these receptors did not alter the cAMP levels with or without 5-HT (**Fig. 5C**, first row). Some of the receptors induced an increase in the  $Ca^{2+}$  level (HTR1A, 1B, 1D)(**Fig. 5C**, second row) and RhoA activity (HTR1B)(**Fig. 5C**, third row), indicating the possibility of  $G\alpha_{q/11}$ -coupling signaling in these receptors. We could not observe the characteristic dynamics of ERK activation with high reproducibility (**Fig. 5C**, fourth row).



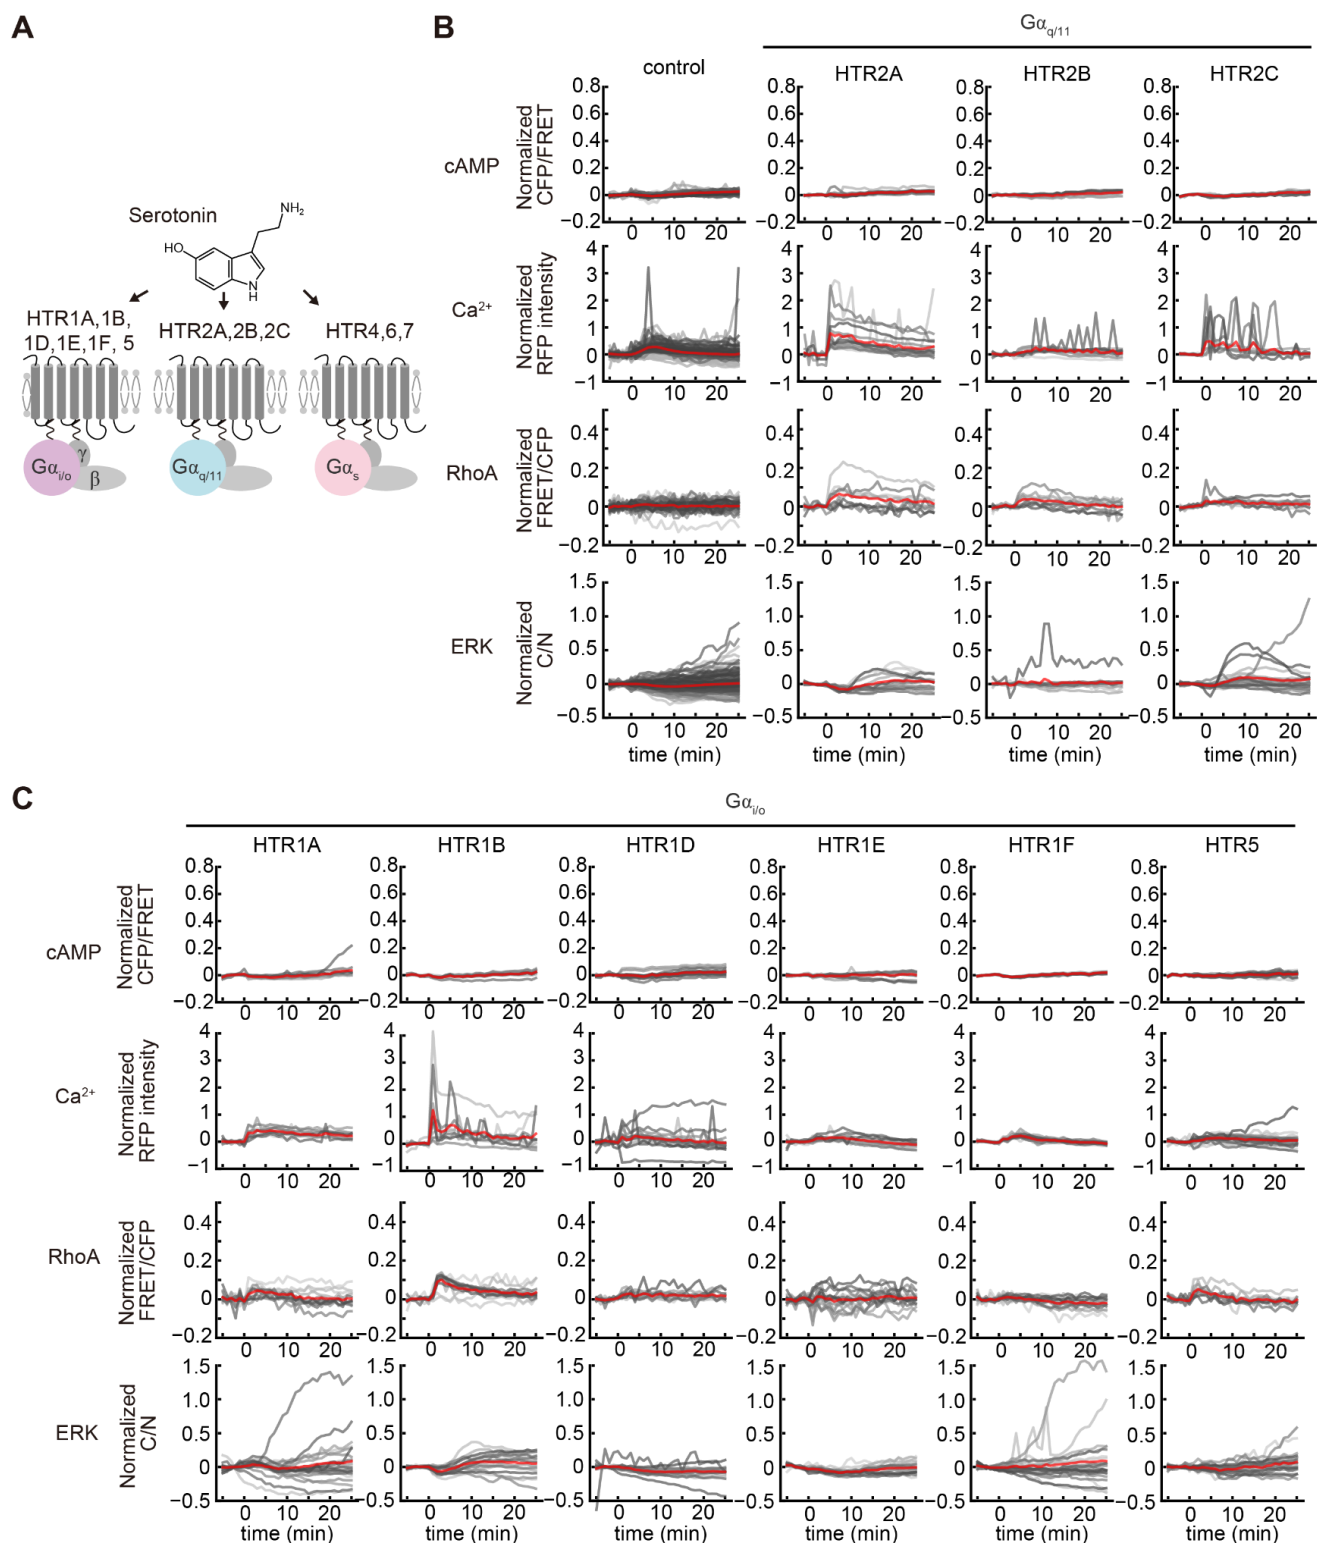

**Figure 5. Signaling dynamics of  $G\alpha$ -protein-coupled serotonin receptors.**

(A) Schematic illustration of serotonin receptor coupling to  $G\alpha$  and downstream signaling. (B, C) Normalized response of each reporter in HeLa cells overexpressing  $G\alpha_{q/11}$ -coupled (B) or  $G\alpha_{i/o}$ -coupled (C) serotonin receptors was plotted as a function of time after 10  $\mu$ M 5-HT administration. The response of the biosensors for cAMP levels,  $Ca^{2+}$  levels, ERK activity, and RhoA activity was normalized by dividing by the averaged value before stimulation and plotted as a function of elapsed



time after stimulation. The red and gray lines represent the time-course for the average and individual cells ( $n > 10$  cells), respectively.

### **Constitutive activity of $G\alpha_s$ -coupled serotonin receptors and their response to ligand**

Finally, we analyzed  $G\alpha_s$ -coupled serotonin receptors, HTR4, HTR6, and HTR7. HeLa cells expressing HTR6 or HTR7 showed a sustained increase in cAMP level upon 5-HT stimulation, while cAMP levels in HTR4-expressing cells exhibited either an increase or a decrease from the basal level (**Fig. 6A**, first row). In most cells,  $Ca^{2+}$  levels did not vary by 5-HT treatment (**Fig. 6A**, second row), whereas RhoA activity slightly but reproducibly increased in cells expressing HTR4, HTR6, or HTR7 (**Fig. 6A**, third row). Like cAMP dynamics, HTR4-expressing cells showed either an increase or decrease in ERK activity from the basal level on 5-HT stimulation (**Fig. 6A**, fourth row).

We focused on the basal cAMP level to further explore the bidirectional regulation of cAMP and ERK activity in the cells expressing HTR4. We found that HTR4 or HTR6 expression enhanced the cAMP level in some cells despite the absence of 5-HT stimulation (**Fig. 6B**, upper panels). Interestingly, cells with higher basal cAMP levels showed a decrease in cAMP levels by 5-HT stimulation and vice versa (**Fig. 6B**, lower panels). As a result, 5-HT stimulation resulted in constant cAMP levels in all cells (**Fig. 6B**, lower panels). Raw values of the CFP/YFP ratio of the cAMP biosensor, which correlated with intracellular cAMP concentration, also demonstrated that 5-HT stimulation kept cAMP levels constant (**Fig. 6C**). These results suggest the constitutive activity of HTR4 and HTR6 for  $G\alpha_s$  signaling in the basal state and homeostatic mechanisms that control cAMP levels in the activating state.

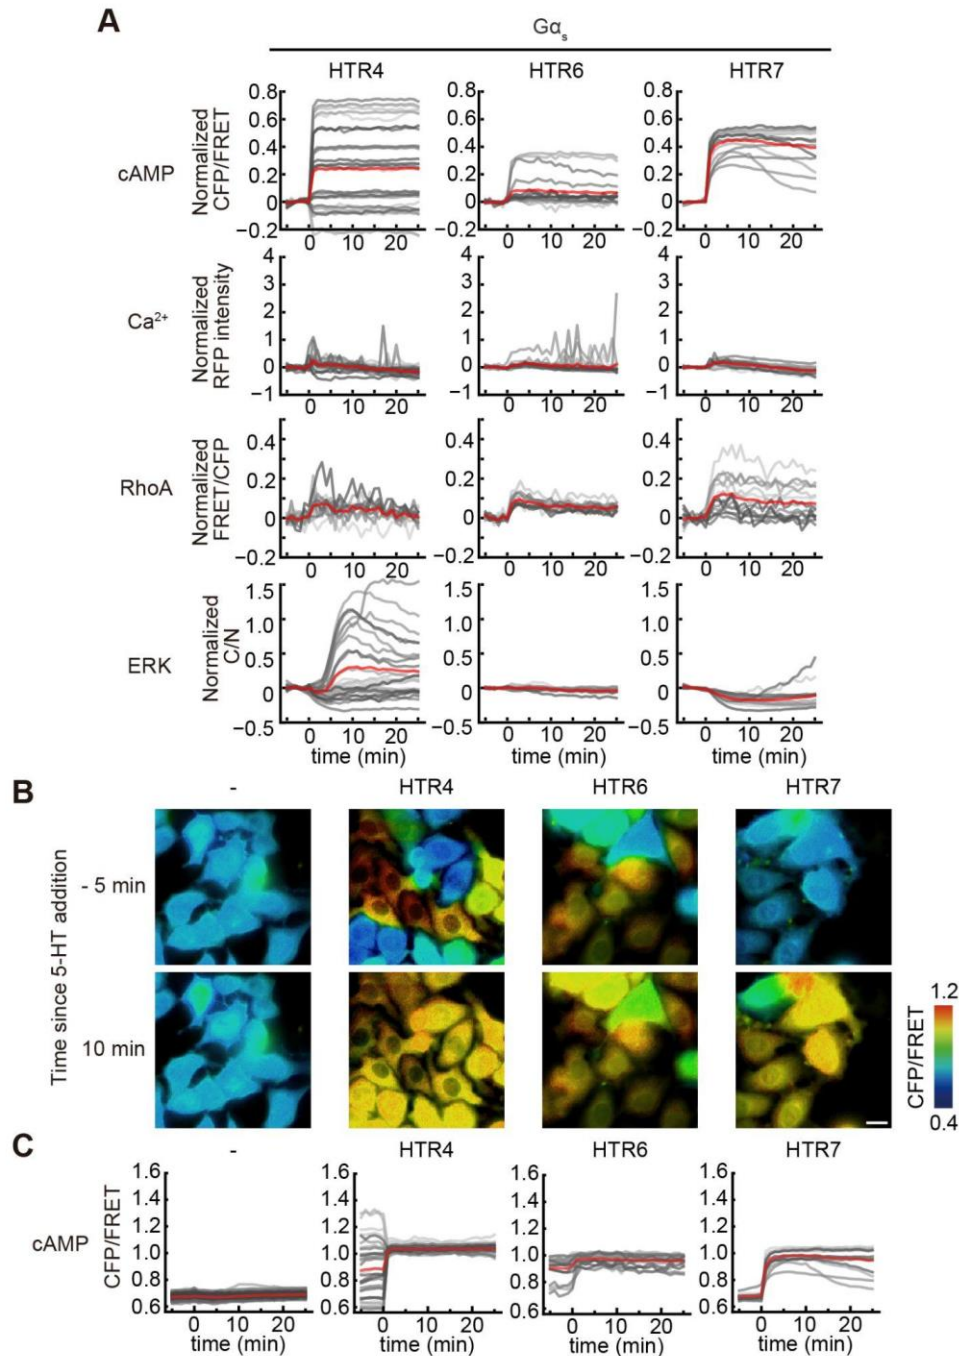

**Figure 6. Constitutive activity of  $G\alpha_s$ -coupled serotonin receptors and their response to ligand.**

(A) Normalized response of each reporter in HeLa cells overexpressing  $G\alpha_s$ -coupled serotonin receptors was plotted as a function of time after 10  $\mu$ M 5-HT administration. Grey lines indicate single-cell responses ( $n > 10$  cells), and the red line represents the mean response. (B) Representative CFP/YFP ratio images of cAMP in HeLa cells overexpressing  $G\alpha_s$ -coupled serotonin receptors before and after the stimulation of 10  $\mu$ M 5-HT. CFP/FRET ratio images are shown in intensity-modulated display mode as in Figure 2. Scale bar 10  $\mu$ m. (C) Time course of CFP/FRET ratio values without normalization. Grey lines indicate single cell ( $n > 10$  cells) responses, and the red line represents the mean response.

## DISCUSSION

In this study, we demonstrate the effectiveness of the multiplexed imaging system to simultaneously visualize multiple GPCR-induced downstream signal dynamics. Targeting dopamine receptors and serotonin receptors, we found that GPCR downstream signaling dynamics are highly variable. Although it is known which Gα protein the dopamine and serotonin receptors couple to, our experimental results indicate that the strength and temporal patterns of the downstream signaling vary among GPCRs. This is probably because the degree of Gα activation by GPCRs and/or inactivation of GPCRs via GRK or β-arrestin differs among GPCRs. The single-cell imaging data further clarify the striking cellular heterogeneity of GPCR downstream signaling, showing diverse signaling dynamics such as responding vs. non-responding cells, sustained vs. transient responses, and pulsatile responses. The observed diversity of dynamics suggests that the GPCR signaling is enhanced by “dynamical encoding,” i.e., utilization of time courses of signaling activities as biological information. Despite dozens to hundreds of GPCRs being expressed in individual cells [48], GPCRs transmit signals primarily through only four types of Gα proteins, namely, Gα<sub>s</sub>, Gα<sub>i/o</sub>, Gα<sub>q/11</sub>, and Gα<sub>12/13</sub>. Thus, it is inevitable that multiple GPCRs in a single cell activate the same type of Gα proteins, making it difficult for cells to interpret the input information. The dynamical-encoding property has been found in many signaling components, including Ca<sup>2+</sup> and ERK [49–51]. Pioneering works have revealed rich signaling dynamics downstream of GPCRs [52]. However, due to the limited number of GPCRs characterized in terms of dynamics, we are still far from unveiling the full diversity of GPCR signaling dynamics. For example, the cross-talk between the dynamics of cAMP and Ca<sup>2+</sup> is of critical importance in neuromodulator signaling [53]. We thus considered that it would be of interest to apply our multiplexed imaging system to other neuromodulator GPCRs.

One unexpected finding was that heterodimerization of dopamine receptors did not enhance the intracellular Ca<sup>2+</sup> increase induced by dopamine stimulation (**Fig. 4**). The most probable reason for this disparity in results is that we used different cell lines from the previous study (HeLa vs. HEK or neurons). A second possible reason is that the GPCR constructs we used in this study contained an HA signal peptide and FLAG-tag fused to the N-terminus and a V2-tail, TEV cleavage site, and rtTA fused to the C-terminus for the TANGO assay [18]. These moieties connected to the GPCRs might prevent the dopamine receptors from forming heterodimers. The third possibility is that the stoichiometry of the

dopamine receptors was not appropriate. More careful analysis for GPCR heterodimers will be required in the future. Another unexpected finding was the constitutive activity of  $G\alpha_s$ -coupled serotonin receptors, HTR4 and HTR6 (**Fig. 6**). The cellular heterogeneity of basal cAMP levels in cells expressing HTR4 or HTR6 is simply explained by the variability in the expression levels of those receptors and the constitutive activity of the receptors for  $G\alpha_s$ . On the other hand, the homeostatic mechanism that maintains cAMP concentration at a constant level upon 5-HT stimulation may be explained by the  $G\alpha_{i/o}$  activity of HTR4 or HTR6. A “fractional measure” or “ratiometric signaling” mechanism has been reported; activated and inactivated GPCRs have opposite regulations to show a stable response to ligand concentration regardless of the receptor expression level [54]. In fact, extensive screening has shown that HTR4 and HTR6 are promiscuous GPCRs, which couple to not only  $G\alpha_s$  but also  $G\alpha_{i/o}$  [19]. Intriguingly, HTR4 modulates GABAergic signaling bidirectionally in a manner dependent on the basal PKA activity [55]. This result can be explained simply by the constitutive and homeostatic activity of HTR4 for cAMP levels in the basal and ligand-stimulated states, respectively.

We established a multiplexed imaging system for quantifying four GPCR downstream signals at the single-cell level. We would like to make two additional points in regard to technical matters. The first concern is endogenous GPCRs. In this study, we targeted dopamine and serotonin receptors, which are not expressed in HeLa cells, and therefore the data analysis was straightforward. However, in cases in which the endogenous GPCR responds to the ligand, the data should be analyzed with great care. The second concerns the biosensors for multiplexed fluorescence imaging. Because of the spectral overlap of biosensors, we established two types of reporter cell lines and co-cultured them. Ideally, it is desirable to establish one type of cell line expressing all reporters from the viewpoint of high-throughput screening. This issue could be solved by using the recently developed single fluorophore-based biosensors [56,57], making it easier to understand cross-talk and feedback control between signaling molecules at the single-cell level. Further studies will be needed to visualize the downstream signaling dynamics of many types of GPCRs and reveal the information processing mechanism.

## Data availability

Data and reagents are available upon request to the corresponding authors.

## Competing Interests

The authors declare that there are no competing interests associated with the manuscript.

## **Funding**

K.A. was supported by the CREST program, a JST Grant (JPMJCR1654), and JSPS KAKENHI Grants (nos. 18H04754 “Resonance Bio”, 18H02444, and 19H05798). Y.G. was supported by a JSPS KAKENHI Grant (no.19K16050) and a Jigami Yoshifumi Memorial Research Grant. Y.K. was supported by JSPS KAKENHI Grants (nos. 19K16207 and 19H05675).

## **Author contributions**

R.T., Y.G., and K.A. designed the research. R.T., Y.K., and Y.G. performed all experiments and data analysis. R.T., Y.G., Y.K., and K.A. wrote the manuscript.

# Acknowledgments

We thank all members of the Aoki Laboratory for their helpful discussions and assistance.

# References

- 1 Fredriksson, R., Lagerström, M. C., Lundin, L.-G. and Schiöth, H. B. (2003) The G-protein-coupled receptors in the human genome form five main families. Phylogenetic analysis, paralogon groups, and fingerprints. *Mol. Pharmacol.* **63**, 1256–1272.
- 2 Hauser, A. S., Attwood, M. M., Rask-Andersen, M., Schiöth, H. B. and Gloriam, D. E. (2017) Trends in GPCR drug discovery: new agents, targets and indications. *Nat. Rev. Drug Discov.* **16**, 829–842.
- 3 Gilman, A. G. (1987) G proteins: transducers of receptor-generated signals. *Annu. Rev. Biochem.* **56**, 615–649.
- 4 Sprang, S. R. (1997) G protein mechanisms: insights from structural analysis. *Annu. Rev. Biochem.* **66**, 639–678.
- 5 Ross, E. M., Howlett, A. C., Ferguson, K. M. and Gilman, A. G. (1978) Reconstitution of hormone-sensitive adenylate cyclase activity with resolved components of the enzyme. *J. Biol. Chem., Elsevier* **253**, 6401–6412.
- 6 Hazeki, O. and Ui, M. (1981) Modification by islet-activating protein of receptor-mediated regulation of cyclic AMP accumulation in isolated rat heart cells. *J. Biol. Chem.* **256**, 2856–2862.
- 7 Williamson, J. R., Cooper, R. H., Joseph, S. K. and Thomas, A. P. (1985) Inositol trisphosphate and diacylglycerol as intracellular second messengers in liver. *Am. J. Physiol.* **248**, C203–16.
- 8 Berridge, M. J. (1984) Inositol trisphosphate and diacylglycerol as second messengers. *Biochem. J* **220**, 345–360.
- 9 Kozasa, T., Jiang, X., Hart, M. J., Sternweis, P. M., Singer, W. D., Gilman, A. G., Bollag, G. and Sternweis, P. C. (1998) p115 RhoGEF, a GTPase activating protein for Gα12 and Gα13. *Science* **280**, 2109–2111.
- 10 Shenoy, S. K., Drake, M. T., Nelson, C. D., Houtz, D. A., Xiao, K., Madabushi, S., Reiter, E., Premont, R. T., Lichtarge, O. and Lefkowitz, R. J. (2006) β-Arrestin-dependent, G Protein-independent ERK1/2 Activation by the β2 Adrenergic Receptor. *J. Biol. Chem.* **281**, 1261–1273.
- 11 Copik, A. J., Baldys, A., Nguyen, K., Sahdeo, S., Ho, H., Kosaka, A., Dietrich, P. J., Fitch, B., Raymond, J. R., Ford, A. P. D. W., et al. (2015) Isoproterenol acts as a biased agonist of the alpha-1A-adrenoceptor that selectively activates the MAPK/ERK pathway. *PLoS One* **10**, e0115701.
- 12 Mochizuki, N., Ohba, Y., Kiyokawa, E., Kurata, T., Murakami, T., Ozaki, T., Kitabatake, A., Nagashima, K. and Matsuda, M. (1999) Activation of the ERK/MAPK pathway by an isoform of rap1GAP associated with Gai. *Nature, Macmillan Magazines Ltd.* **400**, 891.
- 13 Smedler, E. and Uhlén, P. (2014) Frequency decoding of calcium oscillations. *Biochim. Biophys. Acta* **1840**, 964–969.
- 14 Sugiyama, K., Tago, K., Matsushita, S., Nishikawa, M., Sato, K., Muto, Y., Nagase, T. and Ueda, H. (2017) Heterotrimeric G protein Gas subunit attenuates PLEKHG2, a Rho family-specific guanine nucleotide exchange factor, by direct interaction. *Cell. Signal.* **32**, 115–123.
- 15 Maziarz, M., Park, J.-C., Leyme, A., Marivin, A., Garcia-Lopez, A., Patel, P. P. and Garcia-Marcos, M. (2020) Revealing the Activity of Trimeric G-proteins in Live Cells with a Versatile



Biosensor Design. *Cell* **182**, 770–785.e16.

- 16 Olsen, R. H. J., DiBerto, J. F., English, J. G., Glaudin, A. M., Krumm, B. E., Slocum, S. T., Che, T., Gavin, A. C., McCorvy, J. D., Roth, B. L., et al. (2020) TRUPATH, an open-source biosensor platform for interrogating the GPCR transducerome. *Nat. Chem. Biol.* **16**, 841–849.
- 17 Wright, S. C. and Bouvier, M. (2021) Illuminating the complexity of GPCR pathway selectivity - advances in biosensor development. *Curr. Opin. Struct. Biol.* **69**, 142–149.
- 18 Kroeze, W. K., Sassano, M. F., Huang, X.-P., Lansu, K., McCorvy, J. D., Giguère, P. M., Sciaky, N. and Roth, B. L. (2015) PRESTO-Tango as an open-source resource for interrogation of the druggable human GPCRome. *Nat. Struct. Mol. Biol.* **22**, 362–369.
- 19 Inoue, A., Raimondi, F., Kadji, F. M. N., Singh, G., Kishi, T., Uwamizu, A., Ono, Y., Shinjo, Y., Ishida, S., Arang, N., et al. (2019) Illuminating G-Protein-Coupling Selectivity of GPCRs. *Cell*, Elsevier **0**.
- 20 Ponsioen, B., Zhao, J., Riedl, J., Zwartkruis, F., van der Krogt, G., Zaccolo, M., Moolenaar, W. H., Bos, J. L. and Jalink, K. (2004) Detecting cAMP-induced Epac activation by fluorescence resonance energy transfer: Epac as a novel cAMP indicator. *EMBO Rep.* **5**, 1176–1180.
- 21 Wu, J., Liu, L., Matsuda, T., Zhao, Y., Rebane, A., Drobizhev, M., Chang, Y.-F., Araki, S., Arai, Y., March, K., et al. (2013) Improved orange and red Ca<sup>2+</sup> indicators and photophysical considerations for optogenetic applications. *ACS Chem. Neurosci.* **4**, 963–972.
- 22 van Unen, J., Reinhard, N. R., Yin, T., Wu, Y. I., Postma, M., Gadella, T. W. J. and Goedhart, J. (2015) Plasma membrane restricted RhoGEF activity is sufficient for RhoA-mediated actin polymerization. *Sci. Rep., The Author(s)* **5**, 14693.
- 23 Regot, S., Hughey, J. J., Bajar, B. T., Carrasco, S. and Covert, M. W. (2014) High-sensitivity measurements of multiple kinase activities in live single cells. *Cell*, Journal Article, Elsevier **157**, 1724–1734.
- 24 Okashah, N., Wan, Q., Ghosh, S., Sandhu, M., Inoue, A., Vaidehi, N. and Lambert, N. A. (2019) Variable G protein determinants of GPCR coupling selectivity. *Proc. Natl. Acad. Sci. U. S. A.* **116**, 12054–12059.
- 25 Akagi, T., Shishido, T., Murata, K. and Hanafusa, H. (2000) v-Crk activates the phosphoinositide 3-kinase/AKT pathway in transformation. *Proc. Natl. Acad. Sci. U. S. A.* **97**, 7290–7295.
- 26 Zhao, Y., Araki, S., Wu, J., Teramoto, T., Chang, Y.-F., Nakano, M., Abdelfattah, A. S., Fujiwara, M., Ishihara, T., Nagai, T., et al. (2011) An Expanded Palette of Genetically Encoded Ca<sup>2+</sup> Indicators. *Science, American Association for the Advancement of Science* **333**, 1888–1891.
- 27 Yusa, K., Rad, R., Takeda, J. and Bradley, A. (2009) Generation of transgene-free induced pluripotent mouse stem cells by the piggyBac transposon. *Nat. Methods* **6**, 363–369.
- 28 Komatsu, N., Aoki, K., Yamada, M., Yukinaga, H., Fujita, Y., Kamioka, Y. and Matsuda, M. (2011) Development of an optimized backbone of FRET biosensors for kinases and GTPases. *Mol. Biol. Cell*, Journal Article **22**, 4647–4656.
- 29 Kawakami, K. and Noda, T. (2004) Transposition of the Tol2 element, an Ac-like element from the Japanese medaka fish *Oryzias latipes*, in mouse embryonic stem cells. *Genetics* **166**, 895–899.
- 30 Shcherbakova, D. M., Baloban, M., Emelyanov, A. V., Brenowitz, M., Guo, P. and Verkhusha, V. V. (2016) Bright monomeric near-infrared fluorescent proteins as tags and biosensors for multiscale imaging. *Nat. Commun.* **7**, 12405.
- 31 Aoki, K., Kondo, Y., Naoki, H., Hiratsuka, T., Itoh, R. E. and Matsuda, M. (2017) Propagating Wave of ERK Activation Orients Collective Cell Migration. *Dev. Cell*, Elsevier Inc. **43**, 305–317.e5.
- 32 Maryu, G., Matsuda, M. and Aoki, K. (2016) Multiplexed Fluorescence Imaging of ERK and Akt Activities and Cell-cycle Progression. *Cell Struct. Funct.* **41**, 81–92.
- 33 Miyoshi, H., Blömer, U., Takahashi, M., Gage, F. H. and Verma, I. M. (1998) Development of a self-inactivating lentivirus vector. *J. Virol.* **72**, 8150–8157.



- 34 Sakurai, A., Matsuda, M. and Kiyokawa, E. (2012) Activated Ras Protein Accelerates Cell Cycle Progression to Perturb Madin-Darby Canine Kidney Cystogenesis\*. *J. Biol. Chem.* **287**, 31703–31711.
- 35 Hino, N., Rossetti, L., Marín-Llauradó, A., Aoki, K., Trepát, X., Matsuda, M. and Hirashima, T. (2020) ERK-Mediated Mechanochemical Waves Direct Collective Cell Polarization. *Dev. Cell*, Elsevier **0**.
- 36 Moffat, J., Grueneberg, D. A., Yang, X., Kim, S. Y., Kloepper, A. M., Hinkle, G., Piquani, B., Eisenhaure, T. M., Luo, B., Grenier, J. K., et al. (2006) A lentiviral RNAi library for human and mouse genes applied to an arrayed viral high-content screen. *Cell* **124**, 1283–1298.
- 37 Schindelin, J., Arganda-Carreras, I., Frise, E., Kaynig, V., Longair, M., Pietzsch, T., Preibisch, S., Rueden, C., Saalfeld, S., Schmid, B., et al. (2012) Fiji: an open-source platform for biological-image analysis. *Nat. Methods* **9**, 676–682.
- 38 Wise, R. A. (2004) Dopamine, learning and motivation. *Nat. Rev. Neurosci.* **5**, 483–494.
- 39 Beaulieu, J.-M. and Gainetdinov, R. R. (2011) The physiology, signaling, and pharmacology of dopamine receptors. *Pharmacol. Rev.* **63**, 182–217.
- 40 Beaulieu, J.-M., Espinoza, S. and Gainetdinov, R. R. (2015) Dopamine receptors - IUPHAR Review 13. *Br. J. Pharmacol.* **172**, 1–23.
- 41 Andersen, P. H., Gingrich, J. A., Bates, M. D., Dearry, A., Falardeau, P., Senogles, S. E. and Caron, M. G. (1990) Dopamine receptor subtypes: beyond the D1/D2 classification. *Trends Pharmacol. Sci.* **11**, 231–236.
- 42 Lee, S. P., So, C. H., Rashid, A. J., Varghese, G., Cheng, R., Lança, A. J., O'Dowd, B. F. and George, S. R. (2004) Dopamine D1 and D2 receptor Co-activation generates a novel phospholipase C-mediated calcium signal. *J. Biol. Chem.* **279**, 35671–35678.
- 43 Rashid, A. J., So, C. H., Kong, M. M. C., Furtak, T., El-Ghundi, M., Cheng, R., O'Dowd, B. F. and George, S. R. (2007) D1-D2 dopamine receptor heterooligomers with unique pharmacology are coupled to rapid activation of Gq/11 in the striatum. *Proc. Natl. Acad. Sci. U. S. A.* **104**, 654–659.
- 44 Hasbi, A., Fan, T., Alijaniam, M., Nguyen, T., Perreault, M. L., O'Dowd, B. F. and George, S. R. (2009) Calcium signaling cascade links dopamine D1-D2 receptor heteromer to striatal BDNF production and neuronal growth. *Proc. Natl. Acad. Sci. U. S. A.* **106**, 21377–21382.
- 45 Hasbi, A., O'Dowd, B. F. and George, S. R. (2010) Heteromerization of dopamine D2 receptors with dopamine D1 or D5 receptors generates intracellular calcium signaling by different mechanisms. *Curr. Opin. Pharmacol.* **10**, 93–99.
- 46 Davis, K. L., Dennis, C., Joseph, C. and Charles, N. (2002) *Neuropsychopharmacology: The Fifth Generation of Progress*, Lippincott Williams & Wilkins.
- 47 Nichols, D. E. and Nichols, C. D. (2008) Serotonin receptors. *Chem. Rev.* **108**, 1614–1641.
- 48 Insel, P. A., Wilderman, A., Zambon, A. C., Snead, A. N., Murray, F., Aroonsakool, N., McDonald, D. S., Zhou, S., McCann, T., Zhang, L., et al. (2015) G Protein-Coupled Receptor (GPCR) Expression in Native Cells: “Novel” endoGPCRs as Physiologic Regulators and Therapeutic Targets. *Mol. Pharmacol.* **88**, 181–187.
- 49 Purvis, J. E. and Lahav, G. (2013) Encoding and decoding cellular information through signaling dynamics. *Cell* **152**, 945–956.
- 50 Albeck, J. G., Mills, G. B. and Brugge, J. S. (2013) Frequency-modulated pulses of ERK activity transmit quantitative proliferation signals. *Mol. Cell* **49**, 249–261.
- 51 Aoki, K., Kumagai, Y., Sakurai, A., Komatsu, N., Fujita, Y., Shionyu, C. and Matsuda, M. (2013) Stochastic ERK activation induced by noise and cell-to-cell propagation regulates cell density-dependent proliferation. *Mol. Cell* **52**, 529–540.
- 52 Grundmann, M. and Kostenis, E. (2017) Temporal Bias: Time-Encoded Dynamic GPCR Signaling. *Trends Pharmacol. Sci.* **38**, 1110–1124.

- 53 Averaimo, S. and Nicol, X. (2014) Intermingled cAMP, cGMP and calcium spatiotemporal dynamics in developing neuronal circuits. *Front. Cell. Neurosci.* **8**, 376.
- 54 Bush, A., Vasen, G., Constantinou, A., Dunayevich, P., Patop, I. L., Blaustein, M. and Colman-Lerner, A. (2016) Yeast GPCR signaling reflects the fraction of occupied receptors, not the number. *Mol. Syst. Biol.* **12**, 898.
- 55 Cai, X., Flores-Hernandez, J., Feng, J. and Yan, Z. (2002) Activity-dependent bidirectional regulation of GABA(A) receptor channels by the 5-HT(4) receptor-mediated signalling in rat prefrontal cortical pyramidal neurons. *J. Physiol.* **540**, 743–759.
- 56 Mehta, S., Zhang, Y., Roth, R. H., Zhang, J.-F., Mo, A., Tenner, B., Haganir, R. L. and Zhang, J. (2018) Single-fluorophore biosensors for sensitive and multiplexed detection of signalling activities. *Nat. Cell Biol.*
- 57 Mahlandt, E. K., Arts, J. J. G., van der Meer, W. J., van der Linden, F. H., Tol, S., van Buul, J. D., Gadella, T. W. J. and Goedhart, J. (2021, February 8) Visualizing endogenous RhoA activity with an improved localization-based, genetically encoded biosensor. *bioRxiv*.
